# Supplementary material for: ISG15/GRAIL1/CD3 axis influences survival of patients with esophageal adenocarcinoma
Source: JCI Insight. 2024 May 23;9(13):e179315. doi: 10.1172/jci.insight.179315 (PMC11383178; doi:10.1172/jci.insight.179315)
Supplement: Supporting data values [file jciinsight-9-179315-s078.xlsx]

## Sheet: Figure 1A
Tissue Type:	SQ	BE	LGD	HGD	EAC					ANOVA Analysis:	Table Analyzed	CD3 - Stroma						Individual Comparisons:	Number of families	1
	1.07907	0.162569	0.933194	1.70439	0.367306						Data sets analyzed	A-E							Number of comparisons per family	10
	1.346	0.678306	1.41417	0.55135	0.491174														Alpha	0.05
	0.328	0.646019	2.5398	0.723921	0.812247						ANOVA summary
	0.225656	0.416867	0.244189	0.518995	0.738901						F	12.11							Tukey's multiple comparisons test	Mean Diff.	95.00% CI of diff.	Below threshold?	Summary	Adjusted P Value
	1.27538	0.304678	0.392511	0.576967	0.583659						P value	<0.0001							SQ vs. BE	0.7561	0.4095 to 1.103	Yes	****	<0.0001	A-B
	0.583983	0.256194	0.532856	2.21902	0.227547						P value summary	****							SQ vs. LGD	0.5149	0.1572 to 0.8727	Yes	***	0.0009	A-C
	1.43867	0.262969	0.324858	2.50428	0.907471						Significant diff. among means (P < 0.05)?	Yes							SQ vs. HGD	0.4304	0.08379 to 0.7770	Yes	**	0.0066	A-D
	0	0.225689	0.595701	1.00866	0.200664						R squared	0.129							SQ vs. EAC	0.6889	0.3888 to 0.9890	Yes	****	<0.0001	A-E
	1.13951	0.550486	0.113136	0.697194	0.183707														BE vs. LGD	-0.2412	-0.5839 to 0.1016	No	ns	0.3034	B-C
	1.04072	0.649927	0.849361	0.371234	0.48092						Brown-Forsythe test								BE vs. HGD	-0.3257	-0.6568 to 0.005395	No	ns	0.0563	B-D
	1.68835	0.457871	0.384249	0.498789	0.654812						F (DFn, DFd)	5.520 (4, 327)							BE vs. EAC	-0.06722	-0.3493 to 0.2149	No	ns	0.9659	B-E
	0.365609	0.482511	0.703593	0.26472	0.308547						P value	0.0003							LGD vs. HGD	-0.08455	-0.4273 to 0.2582	No	ns	0.9614	C-D
	8.88131	0.343418	0.21753	0.757349	0.210938						P value summary	***							LGD vs. EAC	0.174	-0.1217 to 0.4696	No	ns	0.4895	C-E
	1.6281	0.484596	0.372434	1.11459	0.206432						Are SDs significantly different (P < 0.05)?	Yes							HGD vs. EAC	0.2585	-0.02359 to 0.5406	No	ns	0.0901	D-E
	2.28987	0.202839	0.190361	0.24406	0.7318
	0.5716	0.335914	0.301029	0.303835	0.252206						Bartlett's test								Test details	Mean 1	Mean 2	Mean Diff.	SE of diff.	n1	n2	q	DF
	1.40756	0.1685	0.182083	0.673055	0.306125						Bartlett's statistic (corrected)	174.2							SQ vs. BE	1.162	0.4058	0.7561	0.1264	47	56	8.463	327
	0.392171	0.476123	0.346729	0.369569	0.0853261						P value	<0.0001							SQ vs. LGD	1.162	0.6469	0.5149	0.1304	47	49	5.584	327
	0.7991	0.232024	1.07576	0.398347	0.123304						P value summary	****							SQ vs. HGD	1.162	0.7315	0.4304	0.1264	47	56	4.817	327
	1.70274	0.432173	0.341337	0.578066	0.199425						Are SDs significantly different (P < 0.05)?	Yes							SQ vs. EAC	1.162	0.473	0.6889	0.1094	47	124	8.904	327
	1.13571	0.259068	1.37699	1.00642	0.199578														BE vs. LGD	0.4058	0.6469	-0.2412	0.1249	56	49	2.73	327
	0.263983	0.7725	0.359545	0.285703	0.201995						ANOVA table	SS	DF	MS	F (DFn, DFd)	P value			BE vs. HGD	0.4058	0.7315	-0.3257	0.1207	56	56	3.816	327
	0.935571	0.26577	2.77877	0.35663	0.215799						Treatment (between columns)	19.76	4	4.94	F (4, 327) = 12.11	P<0.0001			BE vs. EAC	0.4058	0.473	-0.06722	0.1028	56	124	0.9244	327
	0.908882	0.277904	0.693286	0.362906	0.167701						Residual (within columns)	133.4	327	0.408					LGD vs. HGD	0.6469	0.7315	-0.08455	0.1249	49	56	0.957	327
	2.09585	0.583599	0.391534	0.838415	0.596184						Total	153.2	331						LGD vs. EAC	0.6469	0.473	0.174	0.1078	49	124	2.282	327
	1.46663	0.33495	1.17583	1.09825	0.649376														HGD vs. EAC	0.7315	0.473	0.2585	0.1028	56	124	3.555	327
	0.464468	0.348683	0.262086	0.388368	1.25834						Data summary
	0.415	0.184806	0.573604	0.541777	0.270939						Number of treatments (columns)	5							Compact letter display
	0.248444	0.862634	0.607864	0.46795	0.399887						Number of values (total)	332							SQ	A
	1.29864	0.182249	0.316833	1.91403	0.285688														HGD	B
	0.1162	0.86815	0.618537	1.94819	0.221432														LGD	B
	0.381659	0.377818	1.00196	2.2522	0.308227														EAC	B
	0.972305	0.311045	0.262618	0.359884	1.11648														BE	B
	0.538535	0.315864	0.474325	0.305793	0.521779
	0.88855	0.258803	0.407788	0.71811	1.0183
	1.1766	0.20953	0.790019	0.965675	0.271582
	0.663275	0.428573	0.48338	0.416367	1.30615
	1.88852	0.161503	1.23529	0.461463	0.99225
	0.966393	0.157741	0.785316	0.508287	2.12896
	1.90159	0.499272	0.500847	0.666113	1.04183
	0.765291	0.332653	0.588244	0.768017	1.68523
	0.552885	0.281981	0.739727	0.26788	0.410679
	2.30359	0.382204	0.231989	0.699656	0.353457
	1.36345	0.342696	1.13669	0.134718	0.219767
	0.523041	0.576858	0.394268	0.337294	0.271444
	1.38839	0.267426	0.298483	1.09076	0.80902
	0.801906	0.177515	0.242192	0.695102	0.182506
		0.284879	0.583918	0.583879	0.162051
		0.303824	0.333249	0.350374	0.804753
		0.223997		0.58814	0.42752
		0.909345		0.176299	0.280492
		0.586132		1.02597	0.63417
		0.24365		0.618833	0.784982
		0.750003		0.70452	0.470671
		0.414378		0.547547	0.225996
		1.21537		0.433466	0.256549
					0.187253
					0.4275
					0.318032
					0.42197
					0.295429
					0.660158
					0.212423
					0.158428
					0.162815
					0.220556
					0.270135
					0.334414
					0.150541
					0.268155
					0.146872
					0.396162
					0.189054
					0.379602
					0.696156
					0.71663
					0.254667
					0.217379
					0.443979
					0.494216
					0.148541
					0.178546
					0.159171
					0.260214
					0.181413
					0.187835
					0.194493
					0.201588
					0.258006
					0.297793
					0.172826
					0.390396
					0.948172
					0.88216
					0.350199
					0.416861
					0.144131
					0.109796
					0.258119
					0.190875
					0.194778
					0.253456
					0.993477
					0.265317
					2.61284
					0.805219
					2.69595
					0.505673
					0.157422
					0.315218
					1.52513
					0.32127
					0.313964
					0.54539
					0.439726
					0.377314
					0.514357
					0.233754
					0.350264
					1.15396
					0.194169
					0.119212
					0.344769
					0.240094

## Sheet: Figure 1B
Tissue Type:	SQ	BE	LGD	HGD	EAC					ANOVA Analysis:	Table Analyzed	CD3 - Target						Individual Comparisons:	Number of families	1
	0.400733	0.20903	0.519108	0.226278	0.331411						Data sets analyzed	A-E							Number of comparisons per family	10
	0.278891	0.546411	0.668627	0.535322	0.3685														Alpha	0.05
	0.246915	0.471988	0.940737	0.545412	0.882361						ANOVA summary
	0.260035	0.368985	0.448939	0.557611	0.758848						F	7.694							Tukey's multiple comparisons test	Mean Diff.	95.00% CI of diff.	Below threshold?	Summary	Adjusted P Value
	0.537774	0.37477	0.595152	0.787788	0.561851						P value	<0.0001							SQ vs. BE	0.03821	-0.07145 to 0.1479	No	ns	0.8746	A-B
	0.362398	0.325769	0.642448	0.631345	0.291927						P value summary	****							SQ vs. LGD	-0.07579	-0.1890 to 0.03739	No	ns	0.3542	A-C
	0.231941	0.299428	0.570736	0.890184	0.499395						Significant diff. among means (P < 0.05)?	Yes							SQ vs. HGD	-0.1156	-0.2252 to -0.005915	Yes	*	0.0332	A-D
	0.157181	0.224636	0.533238	0.674448	0.320309						R squared	0.08602							SQ vs. EAC	0.03801	-0.05695 to 0.1330	No	ns	0.8076	A-E
	0.392881	0.688566	0.14574	0.60088	0.367157														BE vs. LGD	-0.114	-0.2224 to -0.005561	Yes	*	0.0338	B-C
	0.497924	0.545981	0.940351	0.466211	0.512119						Brown-Forsythe test								BE vs. HGD	-0.1538	-0.2586 to -0.04903	Yes	***	0.0007	B-D
	0.459428	0.385589	0.580959	0.357925	0.773179						F (DFn, DFd)	1.546 (4, 327)							BE vs. EAC	-0.0002047	-0.08946 to 0.08905	No	ns	>0.9999	B-E
	0.377053	0.514492	0.517229	0.39814	0.527045						P value	0.1887							LGD vs. HGD	-0.03979	-0.1482 to 0.06865	No	ns	0.8523	C-D
	0.421383	0.36133	0.328541	0.766248	0.486268						P value summary	ns							LGD vs. EAC	0.1138	0.02026 to 0.2073	Yes	**	0.0083	C-E
	0.604774	0.423303	0.355195	0.586632	0.317033						Are SDs significantly different (P < 0.05)?	No							HGD vs. EAC	0.1536	0.06433 to 0.2428	Yes	****	<0.0001	D-E
	0.595884	0.258141	0.282674	0.294099	0.544427
	0.351615	0.370938	0.38473	0.310603	0.509121						Bartlett's test								Test details	Mean 1	Mean 2	Mean Diff.	SE of diff.	n1	n2	q	DF
	0.384577	0.358136	0.240379	0.967321	0.619095						Bartlett's statistic (corrected)	10.48							SQ vs. BE	0.4553	0.4171	0.03821	0.03998	47	56	1.352	327
	0.331311	0.597727	0.431635	0.369752	0.120998						P value	0.033							SQ vs. LGD	0.4553	0.5311	-0.07579	0.04126	47	49	2.598	327
	0.27768	0.449058	0.618517	0.475719	0.189568						P value summary	*							SQ vs. HGD	0.4553	0.5709	-0.1156	0.03998	47	56	4.089	327
	1.23114	0.599374	0.529866	0.618302	0.15138						Are SDs significantly different (P < 0.05)?	Yes							SQ vs. EAC	0.4553	0.4173	0.03801	0.03462	47	124	1.553	327
	0.550543	0.341127	0.718675	0.974312	0.234763														BE vs. LGD	0.4171	0.5311	-0.114	0.03953	56	49	4.078	327
	0.330909	0.437653	0.554094	0.325621	0.184306						ANOVA table	SS	DF	MS	F (DFn, DFd)	P value			BE vs. HGD	0.4171	0.5709	-0.1538	0.03819	56	56	5.695	327
	0.231726	0.419182	1.17085	0.268574	0.245472						Treatment (between columns)	1.257	4	0.3142	F (4, 327) = 7.694	P<0.0001			BE vs. EAC	0.4171	0.4173	-0.0002047	0.03254	56	124	0.008897	327
	0.359483	0.369761	0.410531	0.332314	0.180456						Residual (within columns)	13.36	327	0.04084					LGD vs. HGD	0.5311	0.5709	-0.03979	0.03953	49	56	1.423	327
	1.17016	0.614495	0.61363	0.731591	0.769262						Total	14.61	331						LGD vs. EAC	0.5311	0.4173	0.1138	0.0341	49	124	4.719	327
	0.626713	0.353788	0.736268	0.792184	0.643644														HGD vs. EAC	0.5709	0.4173	0.1536	0.03254	56	124	6.675	327
	0.367659	0.299922	0.368036	0.272703	0.828809						Data summary
	0.218013	0.266492	0.410449	0.547692	0.479307						Number of treatments (columns)	5							Compact letter display
	0.137766	0.879208	0.520904	0.575522	0.51276						Number of values (total)	332							HGD	A
	0.383993	0.258461	0.406577	0.83674	0.411851														LGD	A B
	0.149398	0.410608	0.43148	0.854445	0.375564														SQ	B C
	0.245523	0.363593	0.692368	1.12754	0.645474														EAC	C
	0.531019	0.375216	0.308327	0.312652	0.621409														BE	C
	0.360985	0.392751	0.539206	0.362844	0.540632
	0.564291	0.468689	0.490693	0.417752	0.493789
	0.6533	0.335768	0.586184	1.08499	0.389798
	0.472127	0.358839	0.628187	0.47865	1.30748
	0.744228	0.184296	0.665831	0.470474	1.02748
	0.302202	0.139954	0.549812	0.513743	0.477611
	0.688471	0.598875	0.814682	0.514971	0.522641
	0.471875	0.244568	0.590893	0.767941	0.75439
	0.472755	0.399005	0.897046	0.337744	0.464192
	0.724873	0.605022	0.337864	0.750578	0.415475
	0.720448	0.493448	0.582661	0.25602	0.23731
	0.318891	0.536242	0.453367	0.587113	0.228553
	0.761136	0.339587	0.37078	0.89066	0.662603
	0.439974	0.242232	0.327471	0.755212	0.37475
		0.417679	0.261432	0.644619	0.253369
		0.471092	0.311251	0.324613	0.508799
		0.347653		0.621146	0.382787
		0.604094		0.330703	0.223292
		0.365759		0.591581	0.292396
		0.151443		0.607905	0.858851
		0.608904		0.639353	0.334219
		0.535671		0.540837	0.192993
		0.753356		0.468678	0.305628
					0.23811
					0.454216
					0.334605
					0.451679
					0.312113
					0.423269
					0.211976
					0.2529
					0.345479
					0.31841
					0.279828
					0.443535
					0.209548
					0.250699
					0.126375
					0.64366
					0.16902
					0.451388
					0.556953
					0.60378
					0.338143
					0.324183
					0.39655
					0.380383
					0.233172
					0.258995
					0.288262
					0.547176
					0.47498
					0.441104
					0.353989
					0.26038
					0.314421
					0.454953
					0.310722
					0.410768
					0.5623
					0.598258
					0.346627
					0.316027
					0.228052
					0.266167
					0.33005
					0.205166
					0.268269
					0.276749
					0.57136
					0.456541
					1.0133
					0.510507
					0.945576
					0.46004
					0.238161
					0.362467
					0.26144
					0.421607
					0.353881
					0.408053
					0.28138
					0.395397
					0.499258
					0.273308
					0.248301
					0.341243
					0.156166
					0.19265
					0.339095
					0.239633

## Sheet: Figure 1C
Overall Survival (months)	Low (<0.5; N=26)	High (>0.5; N=27)				Data Summary:		Low (<0.5; N=26)	High (>0.5; N=27)		Curve Comparison:	Comparison of Survival Curves
5	1						Number of rows	53	53
27	1						# of blank rows	27	26			Log-rank (Mantel-Cox) test
18	1						# rows with impossible data	0	0			Chi square	7.064
4	1						# censored subjects	0	3			df	1
13	1						# deaths/events	26	24			P value	0.0079
10	1											P value summary	**
24	1						Median survival	12.5	32			Are the survival curves sig different?	Yes
39	1
14	1											Gehan-Breslow-Wilcoxon test
11	1											Chi square	8.639
86	1											df	1
7	1											P value	0.0033
181	1											P value summary	**
118	1											Are the survival curves sig different?	Yes
21	1
38	1											Median survival
12	1											Low (<0.5; N=26)	12.5
1	1											High (>0.5; N=27)	32
4	1											Ratio (and its reciprocal)	0.3906	2.56
11	1											95% CI of ratio	0.2243 to 0.6803	1.470 to 4.459
5	1
14	1											Hazard Ratio (Mantel-Haenszel)	A/B	B/A
12	1											Ratio (and its reciprocal)	2.249	0.4446
39	1											95% CI of ratio	1.237 to 4.088	0.2446 to 0.8083
2	1
5	1											Hazard Ratio (logrank)	A/B	B/A
79		1										Ratio (and its reciprocal)	2.051	0.4877
22		1										95% CI of ratio	1.145 to 3.673	0.2723 to 0.8735
5		1
88		1
32		1
131		1
76		1
19		1
18		1
61		1
28		1
83		1
204		0
63		1
16		1
301		0
66		1
49		1
23		1
3		1
17		1
12		1
6		1
87		1
216		0
21		1
14		1

## Sheet: Figure 1D
Overall Survival (months)	Low (<0.5; N=26)	High (>0.5; N=27)				Data Summary:		Low (<0.5; N=26)	High (>0.5; N=27)		Curve Comparison:	Comparison of Survival Curves
5	1						Number of rows	53	53
27	1						# of blank rows	27	26			Log-rank (Mantel-Cox) test
4	1						# rows with impossible data	0	0			Chi square	5.698
13	1						# censored subjects	1	2			df	1
10	1						# deaths/events	25	25			P value	0.017
5	1											P value summary	*
39	1						Median survival	14	39			Are the survival curves sig different?	Yes
49	1
5	1											Gehan-Breslow-Wilcoxon test
32	1											Chi square	5.553
14	1											df	1
12	1											P value	0.0184
28	1											P value summary	*
204	0											Are the survival curves sig different?	Yes
24	1
86	1											Median survival
21	1											Low (<0.5; N=26)	14
2	1											High (>0.5; N=27)	39
16	1											Ratio (and its reciprocal)	0.359	2.786
38	1											95% CI of ratio	0.2062 to 0.6249	1.600 to 4.850
12	1
1	1											Hazard Ratio (Mantel-Haenszel)	A/B	B/A
22	1											Ratio (and its reciprocal)	2.097	0.4768
14	1											95% CI of ratio	1.142 to 3.853	0.2595 to 0.8759
11	1
7	1											Hazard Ratio (logrank)	A/B	B/A
5		1										Ratio (and its reciprocal)	1.889	0.5294
21		1										95% CI of ratio	1.055 to 3.383	0.2956 to 0.9480
18		1
4		1
11		1
17		1
39		1
216		0
63		1
66		1
23		1
76		1
79		1
181		1
301		0
3		1
88		1
131		1
12		1
19		1
18		1
61		1
6		1
87		1
14		1
83		1
118		1

## Sheet: Figure 2A
Tissue Type (CD3 Engaged with CD163):	SQ	BE	LGD	HGD	EAC					ANOVA Analysis:	Table Analyzed	TOTAL - CD3+ cells w/in 15um of CD163+ - %						Individual Comparisons:	Number of families	1
	0	8.04	12.96	51.11	3.77						Data sets analyzed	A-E							Number of comparisons per family	10
	0	1.61	22.33	6.8	5														Alpha	0.05
	0	0	31.94	0	0						ANOVA summary
	0	7.02	3.33	32.73	0						F	11.38							Tukey's multiple comparisons test	Mean Diff.	95.00% CI of diff.	Below threshold?	Summary	Adjusted P Value
	25.61	0	17.39	0	0						P value	<0.0001							SQ vs. BE	3.347	-2.339 to 9.032	No	ns	0.4892	A-B
	8.87	0	17.78	42.11	0						P value summary	****							SQ vs. LGD	0.5575	-5.429 to 6.544	No	ns	0.9991	A-C
	0	1.64	0	29.24	18.18						Significant diff. among means (P < 0.05)?	Yes							SQ vs. HGD	-1.792	-7.716 to 4.132	No	ns	0.9213	A-D
	0	0	16.67	22.86	0						R squared	0.1202							SQ vs. EAC	7.362	2.101 to 12.62	Yes	**	0.0014	A-E
		0	0	12.5	0														BE vs. LGD	-2.789	-7.667 to 2.089	No	ns	0.5188	B-C
	40	0	1.92	8.7	0						Brown-Forsythe test								BE vs. HGD	-5.139	-9.939 to -0.3377	Yes	*	0.0291	B-D
	28.89	0	8.2	8.7	0						F (DFn, DFd)	8.808 (4, 333)							BE vs. EAC	4.016	0.06063 to 7.971	Yes	*	0.0446	B-E
	10.77	0	8.47	17.54	0						P value	<0.0001							LGD vs. HGD	-2.349	-7.503 to 2.804	No	ns	0.7217	C-D
	17.45	0	0	0	0						P value summary	****							LGD vs. EAC	6.805	2.428 to 11.18	Yes	***	0.0003	C-E
	2.78	0	2.63	2.78	0						Are SDs significantly different (P < 0.05)?	Yes							HGD vs. EAC	9.154	4.864 to 13.45	Yes	****	<0.0001	D-E
	0	0	0	10.89	8.33
	14.04	0	3.7	0	0						Bartlett's test								Test details	Mean 1	Mean 2	Mean Diff.	SE of diff.	n1	n2	q	DF
	21.54	0	0	0	0						Bartlett's statistic (corrected)	39.68							SQ vs. BE	10.04	6.692	3.347	2.073	32	70	2.283	333
	2.56	0	19.61	0	5.08						P value	<0.0001							SQ vs. LGD	10.04	9.481	0.5575	2.183	32	52	0.3612	333
	32	10.53	0	0	6.25						P value summary	****							SQ vs. HGD	10.04	11.83	-1.792	2.16	32	55	1.173	333
	0	0	3.25	13.95	0						Are SDs significantly different (P < 0.05)?	Yes							SQ vs. EAC	10.04	2.676	7.362	1.918	32	129	5.427	333
	16.18	0	11.11	5.77	0														BE vs. LGD	6.692	9.481	-2.789	1.778	70	52	2.218	333
	0	0	24.24	13.51	0						ANOVA table	SS	DF	MS	F (DFn, DFd)	P value			BE vs. HGD	6.692	11.83	-5.139	1.75	70	55	4.152	333
	0	0	21.99	0	0						Treatment (between columns)	4295	4	1074	F (4, 333) = 11.38	P<0.0001			BE vs. EAC	6.692	2.676	4.016	1.442	70	129	3.938	333
	8.7	0	8.55	10	0						Residual (within columns)	31423	333	94.36					LGD vs. HGD	9.481	11.83	-2.349	1.879	52	55	1.768	333
	27.96	47.62	16	0	0						Total	35718	337						LGD vs. EAC	9.481	2.676	6.805	1.596	52	129	6.031	333
	0	6.67	12.5	0	0														HGD vs. EAC	11.83	2.676	9.154	1.564	55	129	8.276	333
		7.37	17.65	3.4	0						Data summary
	0	0	0	14.29	0						Number of treatments (columns)	5							Compact letter display
	16.98	5.88	13.1	0	0						Number of values (total)	338							HGD	A
	19.17	3.85	0	11.43	1.96														SQ	A B
		0	15.79	10.99	0														LGD	A B
	0	6.82	12.5	7.69	23.08														BE	B
	0	46.43	0	6.9	2.94														EAC	C
	27.73	27.27	2.13	28.15	11.11
	0	2.08	16	46.04	0
		0	15.63	40.54	0
		25	14.81	16.13	0
		12.31	18.18	0	3.33
		0	9.26	0	0
		10.74	5	12.12	1.36
		9.52	1.96	10.29	4.36
		0	12.5	20	3.25
		13.16	3.85	2.78	0
		15.56	2.99	5.71	4.69
		0	11.54	10.14	0
		23.08	10.99	35	0
		0	0	11.76	3.85
		0	2.5	2.17	0
		6.9	0	0	0
		0	7.27	8	0
		14.89	9.52	5.33	0
		14.29	25.27	6.08	0
		0		11.11	0
		0		14	0
		32.43		21.43	0
		22.73			0
		22.22			38.89
		8			2.76
		0			0
		0			2.22
		0			0
		0			0
		0			16
		30			34.21
		0			0
		10			0
		11.32			0
		0			0
		0			0
		3.45			0
					0
					10
					0
					0
					0
					0
					0
					0
					0
					0
					0
					0
					22.76
					4.08
					0
					0
					0
					0
					0
					0
					0
					0
					0
					0
					0
					0
					9.68
					3.23
					0
					0
					0
					0
					0
					0
					0
					0
					26.79
					5.56
					0
					0
					0
					0
					4
					2.75
					0
					0
					0
					26.42
					29.31
					0
					0
					0
					0
					0
					0
					0
					0
					0
					0

## Sheet: Figure 2B
Tissue Type (CD8 Engaged with CD163):	SQ	BE	LGD	HGD	EAC					ANOVA Analysis:	Table Analyzed	CD8+ cells w/in 15um of CD163+ - %						Individual Comparisons:	Number of families	1
	0	0	17.65	33.33	2.94						Data sets analyzed	A-E							Number of comparisons per family	10
	0	3.85	23.26	1.49	5.71														Alpha	0.05
	0	0	36	0	0						ANOVA summary
	20	5.66	6.25	10.53	0						F	7.794							Tukey's multiple comparisons test	Mean Diff.	95.00% CI of diff.	Below threshold?	Summary	Adjusted P Value
	14.71	0	16.67	0	0						P value	<0.0001							SQ vs. BE	4.927	-1.439 to 11.29	No	ns	0.2127	A-B
	0	0	16.67	45.45	0						P value summary	****							SQ vs. LGD	0.4775	-6.215 to 7.171	No	ns	0.9997	A-C
	0	5	0	31.96	0						Significant diff. among means (P < 0.05)?	Yes							SQ vs. HGD	0.7672	-5.811 to 7.345	No	ns	0.9977	A-D
	60	0	6.67	14.29	0						R squared	0.09111							SQ vs. EAC	7.917	1.970 to 13.86	Yes	**	0.0028	A-E
	22.22	0	0	0	0														BE vs. LGD	-4.45	-9.866 to 0.9664	No	ns	0.1629	B-C
	13.33	0	8.57	7.69	0						Brown-Forsythe test								BE vs. HGD	-4.16	-9.433 to 1.113	No	ns	0.196	B-D
	20.69	0	0	0	0						F (DFn, DFd)	8.671 (4, 311)							BE vs. EAC	2.99	-1.472 to 7.451	No	ns	0.3532	B-E
	7.69	0	0	11.43	0						P value	<0.0001							LGD vs. HGD	0.2897	-5.373 to 5.953	No	ns	>0.9999	C-D
	0	0	0	0	1.79						P value summary	****							LGD vs. EAC	7.439	2.523 to 12.36	Yes	***	0.0004	C-E
	5.41	0	0	0	0						Are SDs significantly different (P < 0.05)?	Yes							HGD vs. EAC	7.15	2.392 to 11.91	Yes	***	0.0005	D-E
	18.09	0	4.76	8.82	0
	0	0	0	0	3.77						Bartlett's test								Test details	Mean 1	Mean 2	Mean Diff.	SE of diff.	n1	n2	q	DF
	0	0	26.67	0	12.5						Bartlett's statistic (corrected)	20.22							SQ vs. BE	10.53	5.599	4.927	2.32	30	67	3.003	311
	0	0	0	0	0						P value	0.0005							SQ vs. LGD	10.53	10.05	0.4775	2.439	30	50	0.2769	311
	19.4	8.33	8.11	0	0						P value summary	***							SQ vs. HGD	10.53	9.759	0.7672	2.397	30	55	0.4526	311
	0	0	0	0	0						Are SDs significantly different (P < 0.05)?	Yes							SQ vs. EAC	10.53	2.609	7.917	2.167	30	114	5.166	311
	0	0	32.26	13.04	0														BE vs. LGD	5.599	10.05	-4.45	1.974	67	50	3.188	311
	15	0	20.34	5.26	0						ANOVA table	SS	DF	MS	F (DFn, DFd)	P value			BE vs. HGD	5.599	9.759	-4.16	1.922	67	55	3.061	311
	34.78	0	6	0	0						Treatment (between columns)	3478	4	869.5	F (4, 311) = 7.794	P<0.0001			BE vs. EAC	5.599	2.609	2.99	1.626	67	114	2.6	311
	0	41.67	20	18.75	0						Residual (within columns)	34696	311	111.6					LGD vs. HGD	10.05	9.759	0.2897	2.064	50	55	0.1985	311
	0	0	7.69	0	2.25						Total	38174	315						LGD vs. EAC	10.05	2.609	7.439	1.792	50	114	5.872	311
	23.19	3.33	28.57	0	0														HGD vs. EAC	9.759	2.609	7.15	1.734	55	114	5.831	311
	15.91	0	0	3.57	50						Data summary
	0	12.5	14.81	16.5	0						Number of treatments (columns)	5							Compact letter display
	0	4.55	0	0	0						Number of values (total)	316							SQ	A
	25.37	0	16.13	25	0														LGD	A
		11.11	28.57	3.33	0														HGD	A
		54.55	0	10	0														BE	A B
		25	0	23.08	0														EAC	B
		0	0	26.47	0
		0	22.22	41.18	1.54
		8.33	0	38	4.02
		13.95	20	26.32	4.84
		0	8.33	0	0
		12.5	7.69	0	3.92
		8.33	0	7.69	0
		0	0	9.09	0
		16.67	2.78	0	0
		14.29	12.77	20	0
		0	16.67	0	0
		0	0	9.52	0
		0	8.33	28.57	0
		0	0	0	0
		0	8	0	0
		0	20	0	0
		9.09	30	0	1.86
		0		13.33	0
		0		5.06	0
		0		20	0
		28.57		8	0
		16.67		0	16.67
		33.33			41.43
		6.9			0
		0			0
		0			0
		0			0
		0			0
		0			0
		0			0
		16.67			0
		14.29			0
		0			0
		0			0
					0
					0
					0
					0
					0
					21.59
					0
					0
					0
					0
					0
					0
					0
					0
					0
					0
					0
					4.17
					0
					0
					0
					0
					0
					0
					0
					0
					28.4
					25
					0
					0
					0
					0
					4.88
					1.03
					0
					0
					0
					30
					29.17
					0
					0
					0
					0
					0
					0
					0
					0

## Sheet: Figure 2C
Tissue Type (FoxP3 Engaged with CD163):	SQ	BE	LGD	HGD	EAC					ANOVA Analysis:	Table Analyzed	FoxP3+ cells w/in 15um of CD163+ - %						Individual Comparisons:	Number of families	1
	0	7.14	0	25	8.33						Data sets analyzed	A-E							Number of comparisons per family	10
	0	0	25	10	0														Alpha	0.05
	0	0	25	0	0						ANOVA summary
	0	25	0	51.85	0						F	7.483							Tukey's multiple comparisons test	Mean Diff.	95.00% CI of diff.	Below threshold?	Summary	Adjusted P Value
	26.32	0	0	0	0						P value	<0.0001							SQ vs. BE	4.469	-3.625 to 12.56	No	ns	0.5535	A-B
	5.36	0	36.36	28.57	0						P value summary	****							SQ vs. LGD	2.929	-5.430 to 11.29	No	ns	0.8722	A-C
	16.67	0	0	33.33	25						Significant diff. among means (P < 0.05)?	Yes							SQ vs. HGD	-2.791	-11.09 to 5.512	No	ns	0.8881	A-D
	46.67	0	30.77	25	0						R squared	0.08779							SQ vs. EAC	8.262	0.7869 to 15.74	Yes	*	0.0219	A-E
	50	0	0	20	0														BE vs. LGD	-1.54	-8.298 to 5.217	No	ns	0.9709	B-C
	15.58	0	7.69	5.26	0						Brown-Forsythe test								BE vs. HGD	-7.26	-13.95 to -0.5717	Yes	*	0.0258	B-D
	0	0	8.7	10	0						F (DFn, DFd)	7.369 (4, 311)							BE vs. EAC	3.793	-1.834 to 9.421	No	ns	0.3472	B-E
	0	0	15.63	12.5	0						P value	<0.0001							LGD vs. HGD	-5.72	-12.73 to 1.287	No	ns	0.1679	C-D
	0	0	0	0	0						P value summary	****							LGD vs. EAC	5.334	-0.6698 to 11.34	No	ns	0.1081	C-E
	50	0	0	7.14	45.45						Are SDs significantly different (P < 0.05)?	Yes							HGD vs. EAC	11.05	5.128 to 16.98	Yes	****	<0.0001	D-E
	0	0	0	12.5	0
	58.33	0	0	0	0						Bartlett's test								Test details	Mean 1	Mean 2	Mean Diff.	SE of diff.	n1	n2	q	DF
	0	20	0	0	50						Bartlett's statistic (corrected)	55.14							SQ vs. BE	11.43	6.959	4.469	2.95	29	63	2.143	311
	0	0	18.52	0	0						P value	<0.0001							SQ vs. LGD	11.43	8.5	2.929	3.046	29	52	1.36	311
	0	0	0	0	0						P value summary	****							SQ vs. HGD	11.43	14.22	-2.791	3.026	29	54	1.304	311
	0	64.29	0	26.09	0						Are SDs significantly different (P < 0.05)?	Yes							SQ vs. EAC	11.43	3.166	8.262	2.724	29	118	4.289	311
	12.5	13.33	12.5	0	0														BE vs. LGD	6.959	8.5	-1.54	2.463	63	52	0.8845	311
	0	0	15.63	26.67	0						ANOVA table	SS	DF	MS	F (DFn, DFd)	P value			BE vs. HGD	6.959	14.22	-7.26	2.438	63	54	4.212	311
	0	0	17.31	0	0						Treatment (between columns)	5172	4	1293	F (4, 311) = 7.483	P<0.0001			BE vs. EAC	6.959	3.166	3.793	2.051	63	118	2.615	311
	0	0	7.41	7.69	0						Residual (within columns)	53735	311	172.8					LGD vs. HGD	8.5	14.22	-5.72	2.554	52	54	3.167	311
	5.26	0	14.29	0	0						Total	58906	315						LGD vs. EAC	8.5	3.166	5.334	2.188	52	118	3.447	311
	19.44	7.69	33.33	0	0														HGD vs. EAC	14.22	3.166	11.05	2.16	54	118	7.238	311
	0	40	0	17.5	0						Data summary
	0	0	0	0	0						Number of treatments (columns)	5							Compact letter display
	25.29	4.17	14.29	0	0						Number of values (total)	316							HGD	A
		0	0	11.11	0														SQ	A B
		20	9.09	0	0														LGD	A C
		10	11.11	2.94	0														BE	B C
		0	0	23.26	20														EAC	C
		13.16	0	49.58	0
		14.29	37.5	45.83	0
		0	0	0	0
		12.5	0	0	10
		16.67	12.5	0	0
		0	9.64	50	0
		33.33	2.7	11.11	7.69
		0	3.7	100	4.55
		0	16.67	0	0
		12.5	6.58	5	10
		0	4.17	9.76	0
		23.81	7.5	45.83	0
		0	7.41	16.67	0
		0	0	0	0
		0	3.13	0	0
		15	0	11.11	0
		26.67	4.35	2	0
		20	10.34	9.26	0
		0	13.16	8.33	0
		0		23.53	0
		0		23.44	14.29
		0			0
		0			12.5
		33.33			0
		0			0
		0			15
		0			21.74
		0			0
		0			0
		5.56			0
					0
					0
					0
					50
					0
					0
					0
					0
					0
					0
					0
					0
					0
					25
					0
					0
					0
					0
					0
					0
					0
					0
					0
					0
					0
					0
					0
					10
					0
					0
					0
					0
					0
					0
					0
					0
					25
					0
					0
					0
					0
					0
					0
					0
					0
					0
					0
					0
					19.05
					0
					0
					0
					0
					0
					0

## Sheet: Figure 2D
Survival (Months)	No CD3 Engagement	CD3 Engagement				Data Summary:		No CD3 Engagement	CD3 Engagement		Curve Comparison:	Comparison of Survival Curves
5	1						Number of rows	59	59
181	1						# of blank rows	23	36			Log-rank (Mantel-Cox) test
21	1						# rows with impossible data	1	0			Chi square	5.762
28	1						# censored subjects	1	3			df	1
9	1						# deaths/events	34	20			P value	0.0164
16	1											P value summary	*
27	1						Median survival	13	61			Are the survival curves sig different?	Yes
12	1
4	1											Gehan-Breslow-Wilcoxon test
7	1											Chi square	7.079
14	1											df	1
131	1											P value	0.0078
38	1											P value summary	**
13	1											Are the survival curves sig different?	Yes
12	1
10	1											Median survival
0	1											No CD3 Engagement	13
4	1											CD3 Engagement	61
11	1											Ratio (and its reciprocal)	0.2131	4.692
5	1											95% CI of ratio	0.1227 to 0.3702	2.701 to 8.152
24	1
39	1											Hazard Ratio (Mantel-Haenszel)	A/B	B/A
49	1											Ratio (and its reciprocal)	1.957	0.5109
14	1											95% CI of ratio	1.131 to 3.387	0.2952 to 0.8841
3	1
11	1											Hazard Ratio (logrank)	A/B	B/A
272	0											Ratio (and its reciprocal)	1.911	0.5232
86	1											95% CI of ratio	1.120 to 3.261	0.3066 to 0.8928
71	1
12	1
11	1
6	1
18	1
7	1
2	1
83	1
22		1
118		1
5		1
81		1
39		1
5		1
87		1
61		1
32		1
79		1
76		1
66		1
21		1
14		1
3		1
19		1
204		0
87		1
216		0
17		1
301		0
63		1
23		1

## Sheet: Figure 2E
Survival (Months)	No CD8 Engagement	CD8 Engagement				Data Summary:		No CD8 Engagement	CD8 Engagement		Curve Comparison:	Comparison of Survival Curves
5	1						Number of rows	59	59
21	1						# of blank rows	19	40			Log-rank (Mantel-Cox) test
28	1						# rows with impossible data	1	0			Chi square	7.074
9	1						# censored subjects	1	3			df	1
16	1						# deaths/events	38	16			P value	0.0078
27	1											P value summary	**
12	1						Median survival	14	63			Are the survival curves sig different?	Yes
4	1
7	1											Gehan-Breslow-Wilcoxon test
14	1											Chi square	7.045
131	1											df	1
38	1											P value	0.0079
12	1											P value summary	**
10	1											Are the survival curves sig different?	Yes
0	1
4	1											Median survival
11	1											No CD8 Engagement	14
5	1											CD8 Engagement	63
24	1											Ratio (and its reciprocal)	0.2222	4.5
39	1											95% CI of ratio	0.1239 to 0.3985	2.509 to 8.070
49	1
14	1											Hazard Ratio (Mantel-Haenszel)	A/B	B/A
3	1											Ratio (and its reciprocal)	2.12	0.4718
11	1											95% CI of ratio	1.219 to 3.687	0.2712 to 0.8207
272	0
86	1											Hazard Ratio (logrank)	A/B	B/A
71	1											Ratio (and its reciprocal)	2.112	0.4735
12	1											95% CI of ratio	1.238 to 3.604	0.2775 to 0.8080
11	1
6	1
18	1
7	1
2	1
83	1
22	1
118	1
5	1
39	1
76	1
14	1
87		1
19		1
204		0
61		1
87		1
21		1
5		1
3		1
66		1
216		0
17		1
32		1
79		1
81		1
301		0
23		1
63		1
181		1
13		1

## Sheet: Figure 2F
Survival (Months)	No FoxP3 Engagement	FoxP3 Engagement				Data Summary:		No FoxP3 Engagement	FoxP3 Engagement		Curve Comparison:	Comparison of Survival Curves
5	1						Number of rows	59	59
181	1						# of blank rows	18	41			Log-rank (Mantel-Cox) test
21	1						# rows with impossible data	1	0			Chi square	4.952
28	1						# censored subjects	1	3			df	1
9	1						# deaths/events	39	15			P value	0.0261
16	1											P value summary	*
27	1						Median survival	14	51			Are the survival curves sig different?	Yes
12	1
4	1											Gehan-Breslow-Wilcoxon test
7	1											Chi square	4.152
14	1											df	1
131	1											P value	0.0416
38	1											P value summary	*
13	1											Are the survival curves sig different?	Yes
12	1
10	1											Median survival
0	1											No FoxP3 Engagement	14
4	1											FoxP3 Engagement	51
11	1											Ratio (and its reciprocal)	0.2745	3.643
24	1											95% CI of ratio	0.1513 to 0.4979	2.008 to 6.608
39	1
49	1											Hazard Ratio (Mantel-Haenszel)	A/B	B/A
14	1											Ratio (and its reciprocal)	1.88	0.5319
3	1											95% CI of ratio	1.078 to 3.279	0.3050 to 0.9275
11	1
272	0											Hazard Ratio (logrank)	A/B	B/A
86	1											Ratio (and its reciprocal)	1.906	0.5246
12	1											95% CI of ratio	1.111 to 3.271	0.3057 to 0.9001
11	1
6	1
18	1
7	1
2	1
83	1
81	1
5	1
61	1
32	1
79	1
66	1
14	1
23		1
87		1
87		1
216		0
17		1
22		1
39		1
118		1
21		1
301		0
204		0
63		1
76		1
19		1
5		1
3		1
5		1
71		1

[truncated: 4 more sheets: Figure 3F, Figure 4B, Figure 4D, Figure 4F]
